# Supplementary material
Source: publisher site journal article supplement (https://www.spandidos-publications.com/135/downloadSupplementary)
Supplement: Supplementary file 1 [file downloadSupplementary]

Figure S1. Time course of cytotoxicity of PF-114 in K562 cells. Cells were treated with 0-50 nM PF-114 for the indicated time intervals followed by an MTT assay. Data are presented as the mean  $\pm$  standard deviation of three independent measurements.

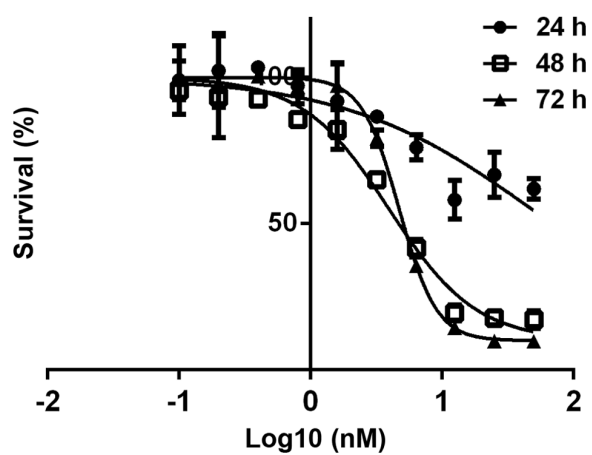

Figure S2. Expression of Bax and Bak proteins in K562 cells treated with PF-114. K562 cells were treated with the indicated concentrations of PF-114 for 24 h. Proteins were analyzed by immunoblotting. Bax, Bcl-2-associated X protein; Bak, Bcl-2 homologous antagonist killer.

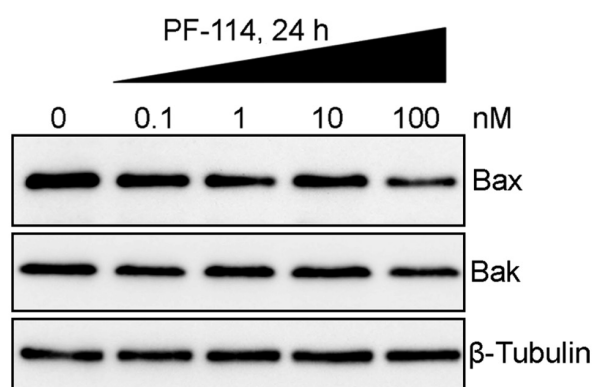

Figure S3. Expression of total and phosphorylated GSK-3 $\beta$  in K562 cells treated with PF-114. K562 cells were treated with the indicated concentrations of PF-114 for 24 h. Proteins were analyzed by immunoblotting. GSK-3 $\beta$ , glycogen synthase kinase-3 $\beta$ .

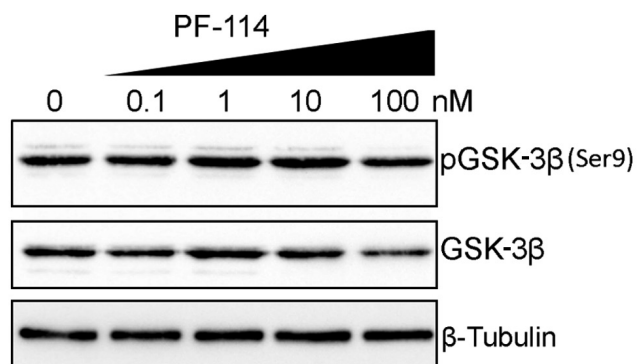

Table SI. Primary antibodies used in the present study.

| Protein           | Primary antibody<br>against human<br>protein | Manufacturer                      | Cat. no. |
|-------------------|----------------------------------------------|-----------------------------------|----------|
| $\beta$ -Actin    | rabbit                                       | Cell Signaling Technology, Inc.   | 4970     |
| Akt               | rabbit                                       | Cell Signaling Technology, Inc.   | 4691     |
| pAkt              | rabbit                                       | Cell Signaling Technology, Inc.   | 4060     |
| Bad               | rabbit                                       | Cell Signaling Technology, Inc.   | 9239     |
| pBad              | rabbit                                       | Cell Signaling Technology, Inc.   | 9291     |
| Bak               | rabbit                                       | Cell Signaling Technology, Inc.   | 12105    |
| Bax               | rabbit                                       | Cell Signaling Technology, Inc.   | 5023     |
| Bcl-xL            | rabbit                                       | Cell Signaling Technology, Inc.   | 2764     |
| Bcl-2             | rabbit                                       | Cell Signaling Technology, Inc.   | 2870     |
| Bid               | rabbit                                       | Cell Signaling Technology, Inc.   | 2002     |
| Bim               | rabbit                                       | Cell Signaling Technology, Inc.   | 2933     |
| Caspase-9         | mouse                                        | Cell Signaling Technology, Inc.   | 9508     |
| Cleaved caspase-9 | rabbit                                       | Cell Signaling Technology, Inc.ng | 7237     |
| CrkL              | rabbit                                       | Santa Cruz Biotechnology, Inc.    | K1212    |
| pCrkL             | mouse, PE<br>conjugated                      | BD Biosciences                    | 560788   |
| Erk 1/2           | rabbit                                       | Cell Signaling Technology, Inc.   | 4695     |
| pErk 1/2          | rabbit                                       | Cell Signaling Technology, Inc.   | 4370     |
| GSK-3 $\beta$     | rabbit                                       | Cell Signaling Technology, Inc.   | 9832     |
| pGSK-3 $\beta$    | rabbit                                       | Cell Signaling Technology, Inc.   | 9332     |
| pJak2 (Y1007)     | rabbit                                       | Cell Signaling Technology, Inc.   | 4406     |
| pJak3 (Y980/981)  | rabbit                                       | Cell Signaling Technology, Inc.   | 5031     |
| Mcl-1             | rabbit                                       | Cell Signaling Technology, Inc.   | 5453     |
| PARP              | rabbit                                       | Cell Signaling Technology, Inc.   | 9542     |
| Cleaved PARP      | rabbit                                       | Cell Signaling Technology, Inc.   | 5625     |
| STAT5             | rabbit                                       | Cell Signaling Technology, Inc.   | 9363     |
| pSTAT5 (Y694)     | rabbit                                       | Cell Signaling Technology, Inc.   | 4322     |
| pSTAT3 (S727)     | rabbit                                       | Cell Signaling Technology, Inc.   | 9134     |
| pSTAT3 (Y705)     | rabbit                                       | Cell Signaling Technology, Inc.   | 9145     |
| STAT3             | rabbit                                       | Cell Signaling Technology, Inc.   | 4904     |
| $\beta$ -tubulin  | rabbit                                       | Cell Signaling Technology, Inc.   | 2146     |
| p27               | rabbit                                       | Cell Signaling Technology, Inc.   | 3686     |
